# Supplementary material for: Variations in infant and childhood vitamin D supplementation programmes across Europe and factors influencing adherence
Source: PubMed Central journal article supplement — Endocr Connect. 2017 Sep 18;6(8):667–75. doi: 10.1530/EC-17-0193 (PMC5655685; doi:10.1530/ec-17-0193), 2017-09-18
Supplement: ec-6-667-s001.pdf [file ec-6-667-s001.pdf]

**Table 1: Recommendations on the duration of vitamin D supplementation in different European countries**

| <b>Duration of supplements</b>                      | <b>Countries</b>                                                                   | <b>Countries recommending additional lifelong supplementation for at-risk population</b> |
|-----------------------------------------------------|------------------------------------------------------------------------------------|------------------------------------------------------------------------------------------|
| First 6 months                                      | Greece                                                                             |                                                                                          |
| First year of life (41%, 12/29)                     | Poland, Turkey, Germany, Spain, Estonia, Romania, Serbia, Albania, Hungary, Israel | Poland                                                                                   |
| First 2 years of life (21%, 6/29)                   | Italy, Ireland, Russia, Denmark, Macedonia, Sweden                                 | Sweden                                                                                   |
| Autumn born- first year, Winter born first 1½ years | Czech Republic, Austria, Portugal                                                  |                                                                                          |
| First 1½ years of life                              | Lithuania                                                                          |                                                                                          |
| First 3 years of life                               | Norway, Switzerland, Bulgaria                                                      |                                                                                          |
| First 4 years of life                               | UK ( <i>from 6 months*</i> )<br>Netherlands ( <i>from birth</i> )                  | Netherlands                                                                              |
| First 5 years                                       | France                                                                             |                                                                                          |
| First 6 years                                       | Belgium                                                                            |                                                                                          |
| From 2 weeks to 18 years                            | Finland                                                                            |                                                                                          |

\*Amended as of 2016 [15]
