# Supplementary material for: Variations in infant and childhood vitamin D supplementation programmes across Europe and factors influencing adherence
Source: PubMed Central journal article supplement — Endocr Connect. 2017 Sep 18;6(8):667–75. doi: 10.1530/EC-17-0193 (PMC5655685; doi:10.1530/ec-17-0193), 2017-09-18
Supplement: ec-6-667-s002.pdf [file ec-6-667-s002.pdf]

**Table 3: Risk Factors for Nutritional Rickets and Osteomalacia [2][3]**

| <i>Maternal Factors</i>                                                                                           | <i>Infant/Childhood Factors</i>                                                                                                 |
|-------------------------------------------------------------------------------------------------------------------|---------------------------------------------------------------------------------------------------------------------------------|
| <b>Vitamin D deficiency</b>                                                                                       | <b>Neonatal vitamin D deficiency secondary to maternal deficiency / Vitamin D deficiency</b>                                    |
| Dark skin pigmentation                                                                                            | Lack of infant supplementation with vitamin D                                                                                   |
| Full body clothing cover                                                                                          | Prolonged breastfeeding without appropriate complementary feeding from 6 months                                                 |
| High latitude during winter/spring season                                                                         | High latitude during winter/spring season                                                                                       |
| Other causes of restricted sun (UVB) exposure, e.g. predominant indoor-living, disability, pollution, cloud cover | Dark skin pigmentation and/or restricted sun (UVB) exposure, e.g. predominant indoor-living, disability, pollution, cloud cover |
| Low Vitamin D diet                                                                                                | Low Vitamin D diet                                                                                                              |
| <b>Low Calcium Diet</b>                                                                                           | <b>Low Calcium Diet</b>                                                                                                         |
| Poverty, malnutrition, special diets                                                                              | Poverty, malnutrition, special diets                                                                                            |
